# Supplementary material
Source: PubMed Central journal article supplement (PMC5445010)
Supplement: NIHMS857258-supplement-Accepted_SI.pdf [file NIHMS857258-supplement-Accepted_SI.pdf]

## Supporting Information

### Table of Contents

Figure S1. Compilation of IspH and model compound NRVS spectra

Figure S2. Structures of commercially available compounds used in initial screening

Figure S3. Structures of commercially available analogs of **8** and activities against IspH

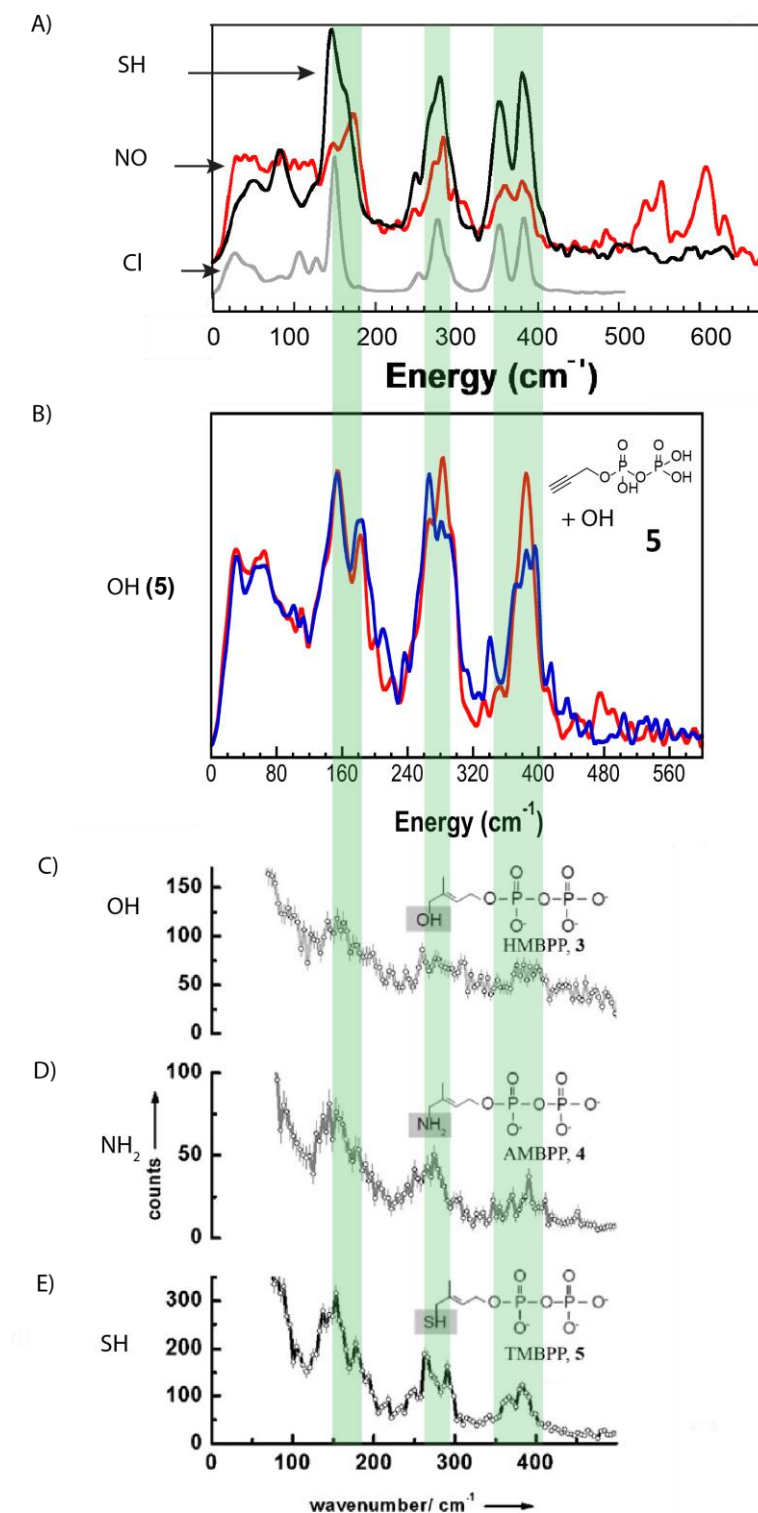

Figure S1. IspH and model compound NRVS spectra comparisons. A) Spectra from Figure 1B in the Text. B) Spectra from Figure 1C in the Text. C)-E) Spectra from Reference 16 in the Text. The frequency axes are all scaled to be the same and the green bands have been added to show that the 3 main features are present in each system. The ligand atoms bound to the 4<sup>th</sup> Fe are indicated on the left.

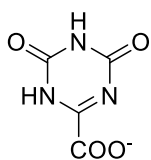

ZINC13514753

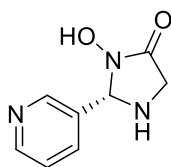

ZINC17429660

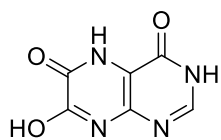

ZINC02139604

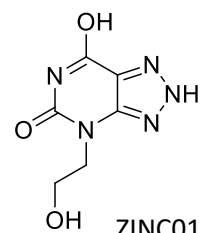

ZINC01470795

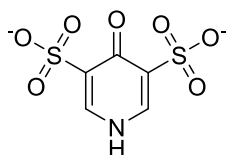

ZINC19815517

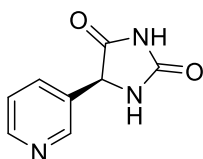

ZINC02041730

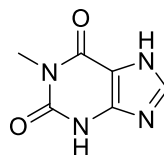

ZINC13517144

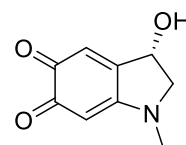

ZINC01600115

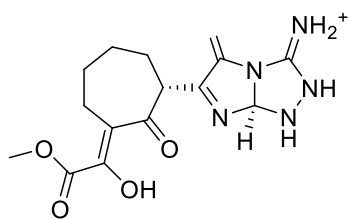

ZINC08653218

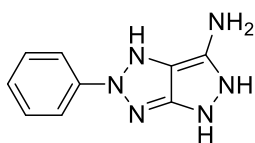

ZINC05687422

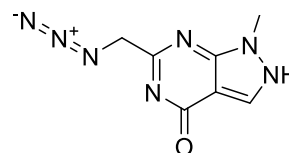

ZINC14134853

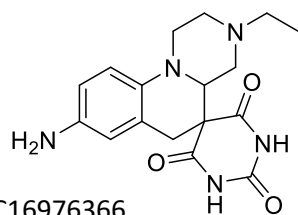

ZINC16976366

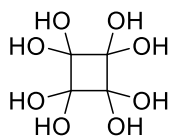

ZINC25720851

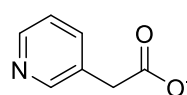

ZINC00152270

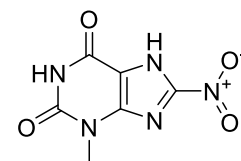

ZINC15909767

Figure S2. Structures of compounds from the *in silico* screen that were tested for IspH inhibition activity.

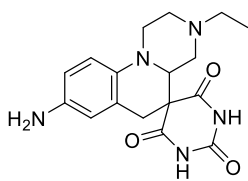

(CAS: 919735-08-3) **8**,  $IC_{50} = 22 \mu M$

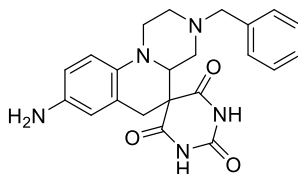

(CAS: 921163-37-3) **9**,  $IC_{50} = 23 \mu M$

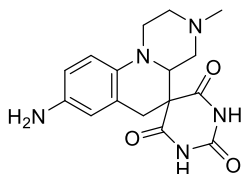

(CAS: 879578-61-7)  $IC_{50} = 65 \mu M$

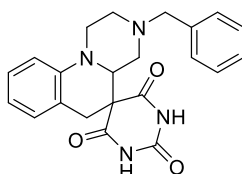

(CAS: 879578-61-7)  $IC_{50} = 113 \mu M$

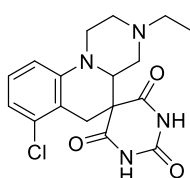

(CAS: 879454-42-9)  
No effect at 0.4 mM

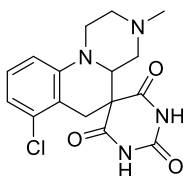

(CAS: 896674-96-7)  
No effect at 0.4 mM

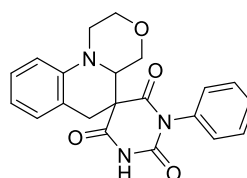

(CAS: 879457-44-0) No effect  
at 200  $\mu M$

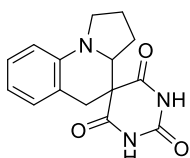

(CAS: 878489-40-8)  
No effect at 100  $\mu M$

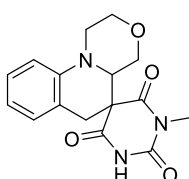

(CAS: 879459-40-2)  
No effect at 100  $\mu M$

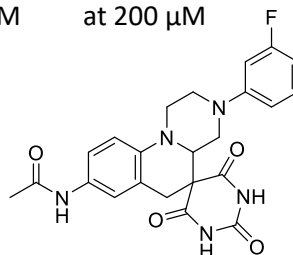

(PHAR112843) No effect at 0.4 mM

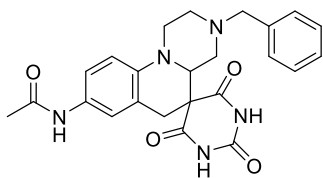

(CAS: 879432-98-1)  
No effect at 0.4 mM

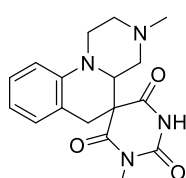

(CAS: 879570-28-2)  
No effect at 0.4 mM

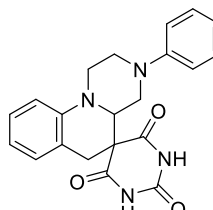

(CAS: 859128-43-1)  
No effect at 0.4 mM

Figure S3. Structures of analogs of **8** that were tested for IspH inhibition activity.
